# Supplementary material
Source: PubMed Central journal article supplement (PMC7577995)
Supplement: NIHMS1586320-supplement-1.pdf [file NIHMS1586320-supplement-1.pdf]

Supplemental Table 1. *In silico* pathogenicity scores for *TRPV4* splice variants affected by our patient's mutation. Ensembl transcript (ENST) and protein (ENSP) identification numbers are shown. Scores for SIFT,<sup>12</sup> PolyPhen2,<sup>13</sup> and CADD<sup>14</sup> scores were calculated using the Ensembl Variant Effect Predictor website (<https://useast.ensembl.org/Tools/VEP>). SIFT and PolyPhen2 scores are presented with interpretations. CADD PHRED scores represent raw CADD scores normalized to all potential single nucleotide variations genome-wide.<sup>15</sup> A score greater than 20 indicates that a variant is in the top 1% genome-wide in terms of estimated pathogenicity.

| Transcript        | Protein         | Protein position | SIFT               | PolyPhen2                 | CADD PHRED |
|-------------------|-----------------|------------------|--------------------|---------------------------|------------|
| ENST00000261740.7 | ENSP00000261740 | 435              | Deleterious (0.03) | Benign (0.141)            | 41         |
| ENST00000418703.6 | ENSP00000406191 | 435              | Deleterious (0.03) | Benign (0.141)            | 41         |
| ENST00000538125.5 | ENSP00000437449 | 435              | Deleterious (0.03) | Benign (0.141)            | 41         |
| ENST00000541794.5 | ENSP00000442167 | 388              | Deleterious (0.03) | Possibly damaging (0.664) | 41         |
| ENST00000536838.1 | ENSP00000444336 | 401              | Deleterious (0.02) | Possibly damaging (0.767) | 41         |
